# Supplementary material for: Genomic abundance and transcriptional activity of diverse gypsy and copia long terminal repeat retrotransposons in three wild sunflower species
Source: PubMed Central journal article supplement (PMC5755311; doi:10.1186/s12870-017-1223-z), 2018-01-05
Supplement: 12870_2017_1223_MOESM1_ESM.pdf [file 12870_2017_1223_MOESM1_ESM.pdf]

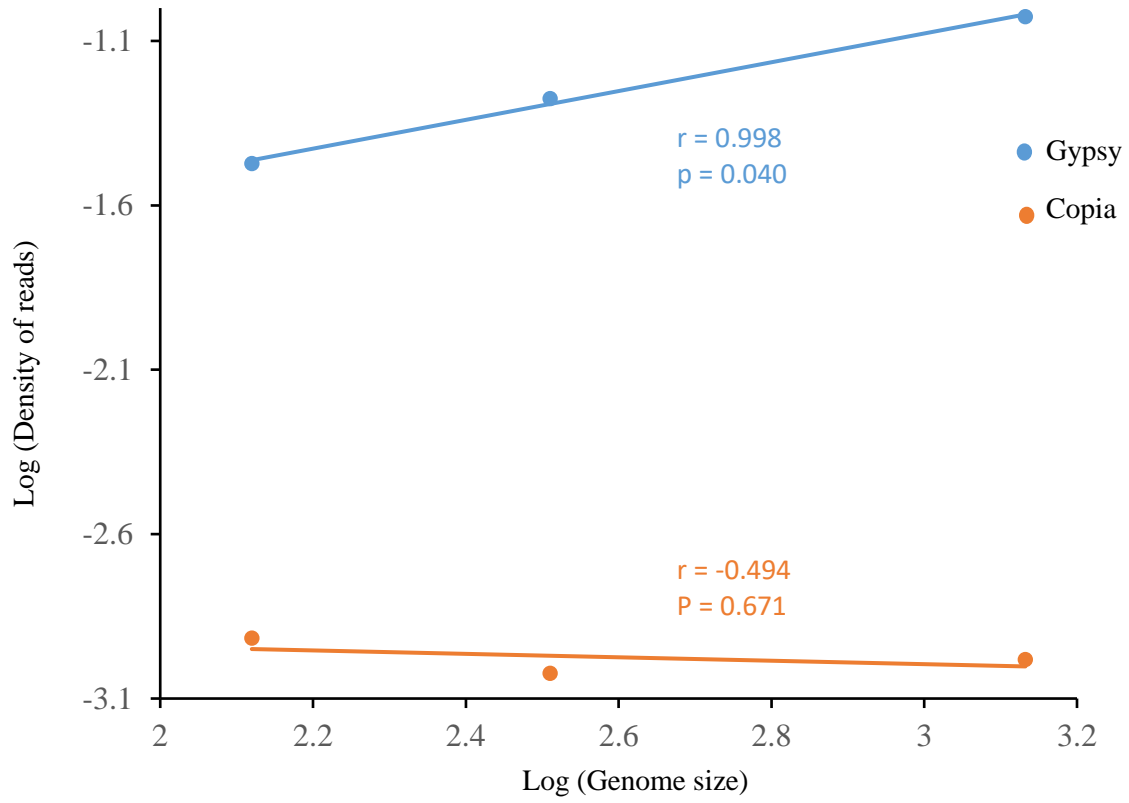

**Figure S1** Pearson's correlation between density of reads and nuclear genome size for *gypsy* and *copia* elements.

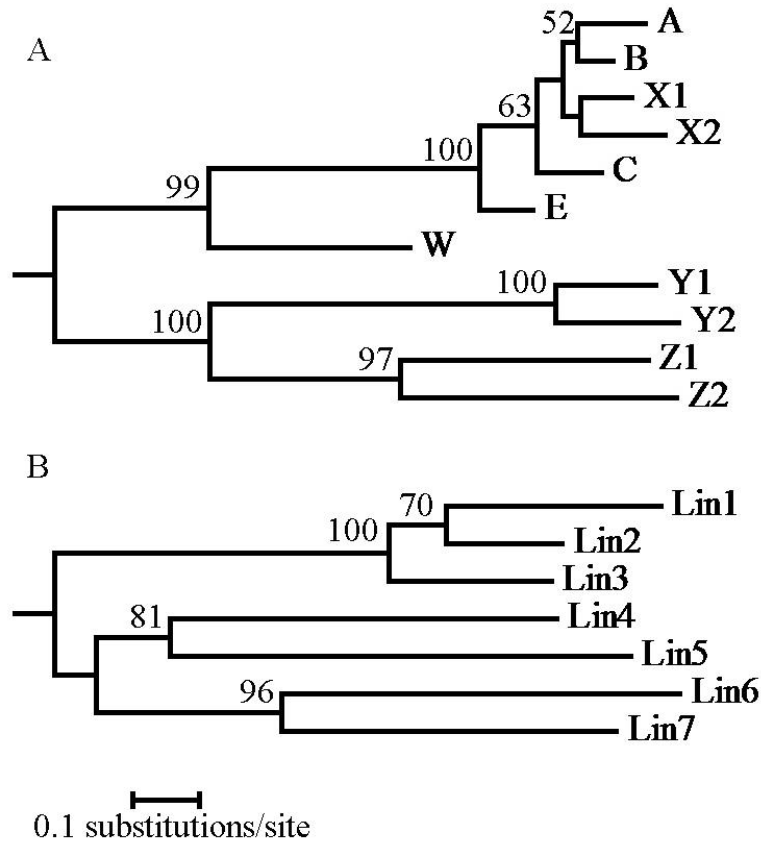

**Figure S2** Phylogenetic relationship among different sublineages of (A) *gypsy* and (B) *copia* based on amino acid sequences of the reverse transcriptase domain (*gypsy*, 173 a.a.; *copia*, 250 a.a.) using maximum likelihood. Bootstrap scores are presented for internal branches with >50 % support.

**Table S1** Summary statistics of DNA-seq and RNA-seq data

| Sequencing type | Species            | Replicates | Number of raw reads | Number of reads after trimming | Mean length of trimmed reads (bp) |
|-----------------|--------------------|------------|---------------------|--------------------------------|-----------------------------------|
| DNA-seq         | <i>H. agrestis</i> | AGR1       | 38,554,268          | 28,610,193                     | 99.6                              |
|                 |                    | AGR2       | 38,282,728          | 28,640,114                     | 99.6                              |
|                 |                    | AGR3       | 40,376,468          | 29,519,333                     | 99.6                              |
|                 | <i>H. carnosus</i> | CAR1       | 34,000,952          | 24,639,844                     | 99.6                              |
|                 |                    | CAR2       | 36,392,088          | 26,776,432                     | 99.6                              |
|                 |                    | CAR3       | 38,609,046          | 28,317,411                     | 99.6                              |
|                 | <i>H. porteri</i>  | POR1       | 59,893,198          | 44,461,335                     | 99.6                              |
|                 |                    | POR2       | 63,510,716          | 48,040,581                     | 99.7                              |
|                 |                    | POR3       | 42,380,084          | 31,137,587                     | 99.6                              |
| RNA-seq         | <i>H. agrestis</i> | AGR1       | 39,956,738          | 36,263,031                     | 93.7                              |
|                 |                    | AGR2       | 43,991,344          | 39,901,894                     | 93.8                              |
|                 |                    | AGR3       | 41,116,568          | 37,346,480                     | 93.9                              |
|                 | <i>H. carnosus</i> | CAR1       | 56,917,536          | 51,694,853                     | 93.8                              |
|                 |                    | CAR2       | 48,492,050          | 44,007,765                     | 93.8                              |
|                 |                    | CAR3       | 52,736,736          | 47,940,872                     | 93.8                              |
|                 | <i>H. porteri</i>  | POR1       | 44,362,868          | 40,207,966                     | 93.8                              |
|                 |                    | POR2       | 49,721,984          | 45,154,958                     | 93.8                              |
|                 |                    | POR3       | 35,754,786          | 32,591,321                     | 93.8                              |
